# Supplementary material
Source: Springer Nature journal article supplement (https://www.springermedizin.de/resource/supplementary/12931_2014_1516_MOESM5_ESM.pdf/9426366)

■—■ Placebo    ◆◆◆◆ UMEC 125    ●●●● UMEC/VI 125/25

**A**

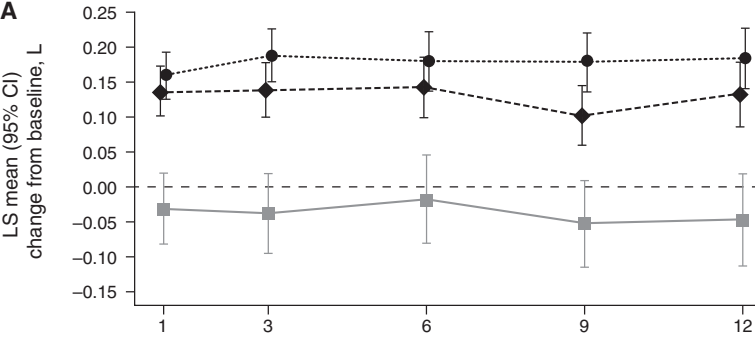

**B**

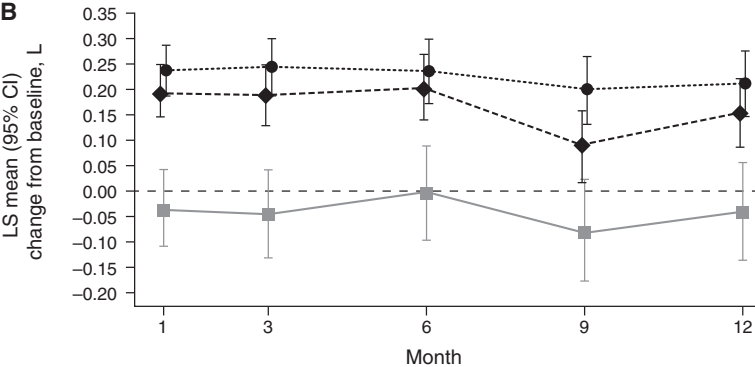

Supplement: MOESM5 [file 9426366]
